# Supplementary material for: Fetal de novo 6q24.3-q25.1 microdeletion encompassing TAB2 gene associated with small left atrium, growth restriction, and urogenital/anal abnormalities: a case report
Source: Research Square preprint supplement (doi:10.21203/rs.3.rs-6972884/v1), 2025-09-22
Supplement: Supplementary file 1 [file 26641946b9f58b7d1ebc1bdb.pdf]

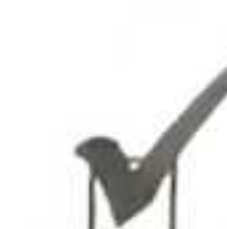

| Topic                               | Item | Checklist item description                                                                                   | Reported on Line                                                                   |
|-------------------------------------|------|--------------------------------------------------------------------------------------------------------------|------------------------------------------------------------------------------------|
| <b>Title</b>                        | 1    | The diagnosis or intervention of primary focus followed by the words "case report" .....                     | <input checked="" type="checkbox"/>                                                |
| <b>Key Words</b>                    | 2    | 2 to 5 key words that identify diagnoses or interventions in this case report, including "case report" ..... | <input checked="" type="checkbox"/>                                                |
| <b>Abstract<br/>(no references)</b> | 3a   | Introduction: What is unique about this case and what does it add to the scientific literature? .....        | we identified two new features                                                     |
|                                     | 3b   | Main symptoms and/or important clinical findings .....                                                       | small left atrium, growth abnormality, and urogenital/anal abnormality             |
|                                     | 3c   | The main diagnoses, therapeutic interventions, and outcomes .....                                            | Termination of pregnancy                                                           |
|                                     | 3d   | Conclusion—What is the main "take-away" lesson(s) from this case? .....                                      | The growth abnormalities are more severe than cardiac abnormality present          |
| <b>Introduction</b>                 | 4    | One or two paragraphs summarizing why this case is unique (may include references) .....                     | This case identified two new features, namely a small left atrium and anal atresia |
| <b>Patient Information</b>          | 5a   | De-identified patient specific information. ....                                                             |                                                                                    |
|                                     | 5b   | Primary concerns and symptoms of the patient. ....                                                           | whether to continue the pregnancy                                                  |
|                                     | 5c   | Medical, family, and psycho-social history including relevant genetic information .....                      | not include                                                                        |
|                                     | 5d   | Relevant past interventions with outcomes .....                                                              | NO                                                                                 |
| <b>Clinical Findings</b>            | 6    | Describe significant physical examination (PE) and important clinical findings. ....                         | thickened NT, FGR, small left atrium, anal atresia                                 |
| <b>Timeline</b>                     | 7    | Historical and current information from this episode of care organized as a timeline .....                   | 12 <sup>th</sup> w → 25 <sup>th</sup> w → 30 <sup>th</sup> w                       |
| <b>Diagnostic Assessment</b>        | 8a   | Diagnostic testing (such as PE, laboratory testing, imaging, surveys). ....                                  | a 1.12mb de novo deletion on chromosome 6q24.39-25.1                               |
|                                     | 8b   | Diagnostic challenges (such as access to testing, financial, or cultural) .....                              | whether the prognosis of the fetus is good                                         |
|                                     | 8c   | Diagnosis (including other diagnoses considered) .....                                                       | 6q25.1 (TAB2) microdeletion                                                        |
|                                     | 8d   | Prognosis (such as staging in oncology) where applicable .....                                               | not good                                                                           |
| <b>Therapeutic Intervention</b>     | 9a   | Types of therapeutic intervention (such as pharmacologic, surgical, preventive, self-care) .....             | surgical treatment                                                                 |
|                                     | 9b   | Administration of therapeutic intervention (such as dosage, strength, duration) .....                        | NO                                                                                 |
|                                     | 9c   | Changes in therapeutic intervention (with rationale) .....                                                   | NO                                                                                 |
| <b>Follow-up and Outcomes</b>       | 10a  | Clinician and patient-assessed outcomes (if available) .....                                                 | not available                                                                      |
|                                     | 10b  | Important follow-up diagnostic and other test results .....                                                  | refused to consent to a fetal autopsy                                              |
|                                     | 10c  | Intervention adherence and tolerability (How was this assessed?) .....                                       | NO                                                                                 |
|                                     | 10d  | Adverse and unanticipated events .....                                                                       | NO                                                                                 |
| <b>Discussion</b>                   | 11a  | A scientific discussion of the strengths AND limitations associated with this case report .....              | Yes                                                                                |
|                                     | 11b  | Discussion of the relevant medical literature <b>with references</b> . ....                                  | Yes                                                                                |
|                                     | 11c  | The scientific rationale for any conclusions (including assessment of possible causes) .....                 | Yes                                                                                |
|                                     | 11d  | The primary "take-away" lessons of this case report (without references) in a one paragraph conclusion ..... | <input checked="" type="checkbox"/>                                                |
| <b>Patient Perspective</b>          | 12   | The patient should share their perspective in one to two paragraphs on the treatment(s) they received .....  |                                                                                    |
| <b>Informed Consent</b>             | 13   | Did the patient give informed consent? Please provide if requested .....                                     | Yes <input checked="" type="checkbox"/> No <input type="checkbox"/>                |
